# Supplementary material for: TGF-β1 increases viral burden and promotes HIV-1 latency in primary differentiated human bronchial epithelial cells
Source: PubMed Central journal article supplement (PMC6715689; doi:10.1038/s41598-019-49056-6), 2019-08-29
Supplement: 41598_2019_49056_MOESM1_ESM.pdf [file 41598_2019_49056_MOESM1_ESM.pdf]

**TGF- $\beta$ 1 increases viral burden and promotes HIV-1 latency in primary differentiated human bronchial epithelial cells**

Chinnapaiyan S<sup>1</sup>., Dutta RK<sup>1</sup>., Nair M<sup>1</sup>., Chand HS<sup>1</sup>., Rahman I<sup>2</sup>., and Unwalla HJ<sup>1\*</sup>.

\*To whom correspondence should be addressed.

Hoshang Unwalla, PhD, Department of Immunology and Nano-Medicine, Herbert Wertheim College of Medicine, Florida International University, 11200 SW 8th street, AHC-1 # 421, Miami, FL 33199, USA. Tel.: 305-348-3442; Fax: 305-243-6992;  
email: hunwalla@fiu.edu

1. Department of Immunology and Nano-Medicine, Herbert Wertheim College of Medicine, Florida International University, Miami, FL 33199, USA.
2. University of Rochester Medical Center, School of Medicine and Dentistry, Rochester, NY 14642, USA

SUPPLEMENTARY FIGURE 1

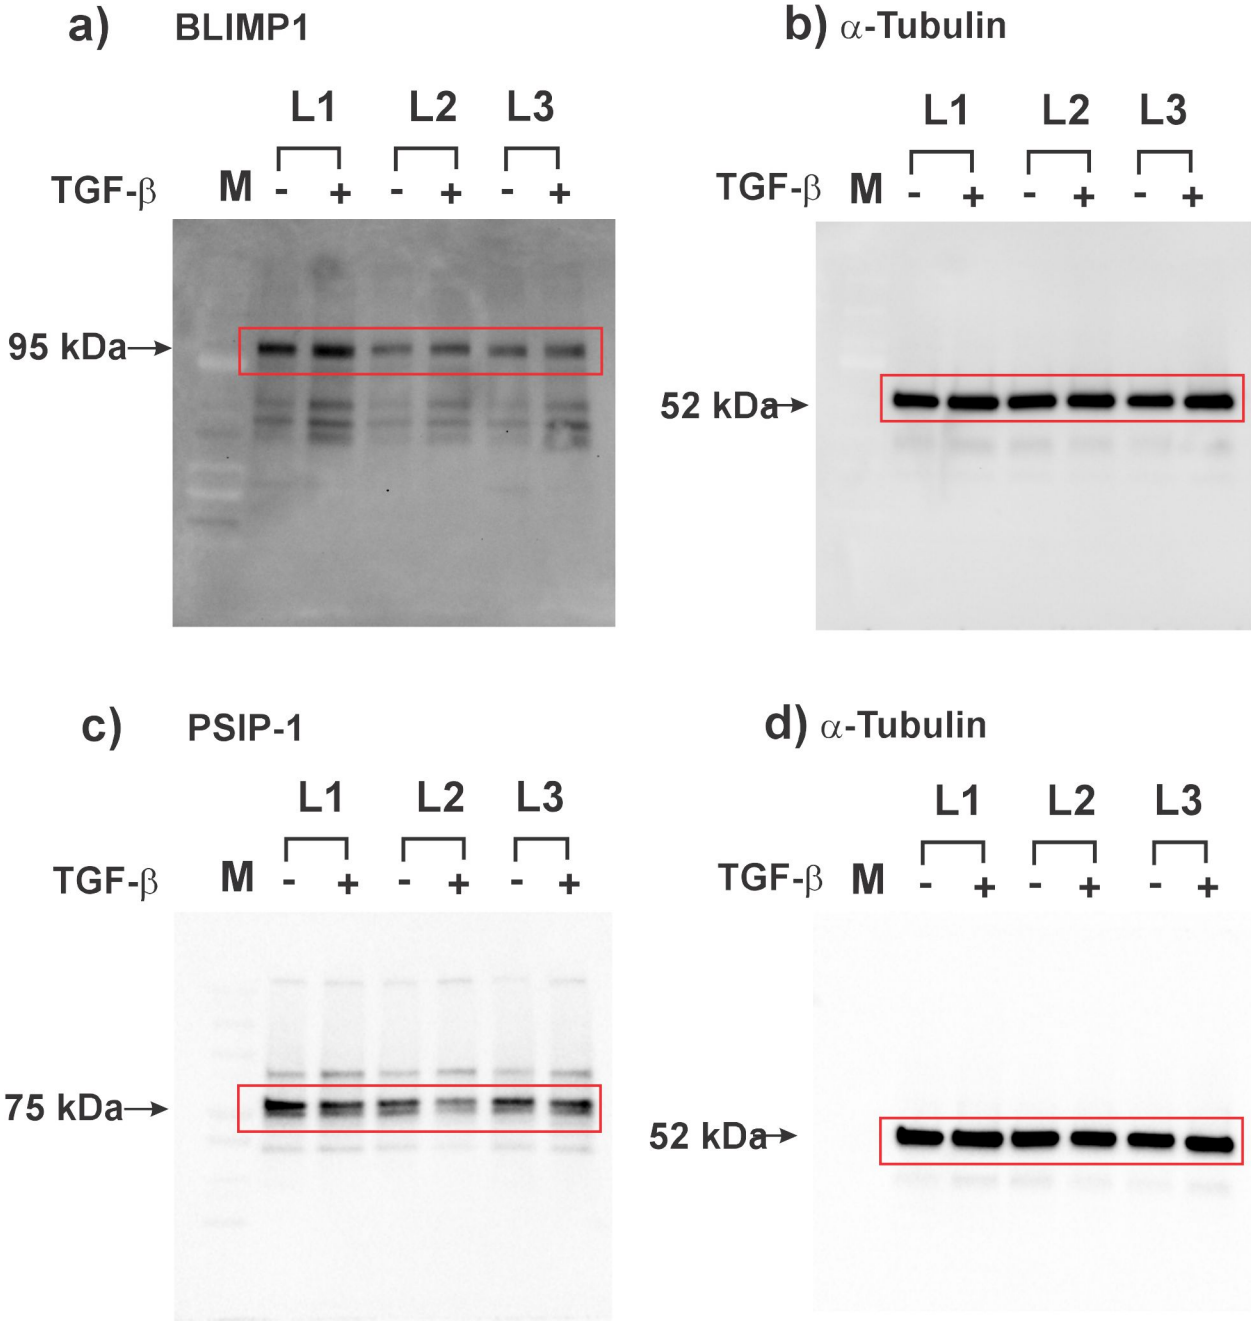

Full length western blot images. Panel a) BLIMP1; Panel b) PSIP-1. M: Protein marker;

Lane 2: Vehicle; Lane 3: TGF- $\beta$ 1; Lane 4: Vehicle; Lane 5: TGF- $\beta$ 1; Lane 6: Vehicle; Lane 7: TGF- $\beta$ 1. Red color highlighted bands were used for our manuscript. L1: Lung 1; L2: Lung 2; L3: Lung 3.

## SUPPLEMENTARY FIGURE 2

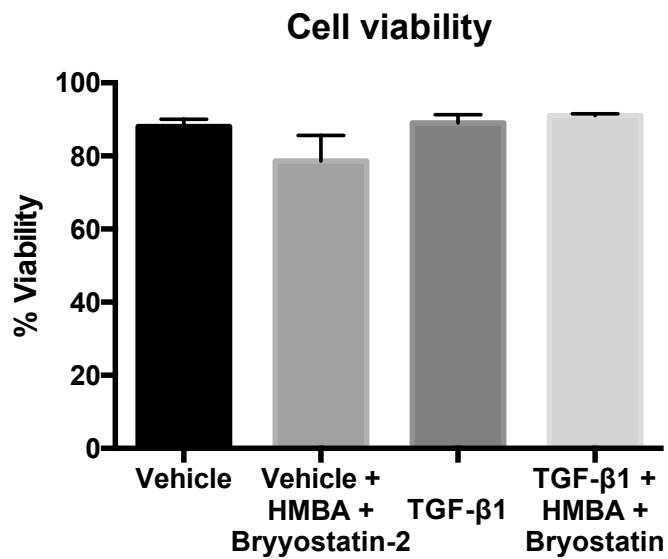

NHBE ALI cultures were infected with HIV BaL strain as described in Figure 1a. On day 8, Cell viability was determined using trypan blue staining. Only a marginal decrease in cell viability was observed using our infection and Treatment regimen.
